# Supplementary material for: Improved pathology reporting in NAFLD/NASH for clinical trials
Source: PubMed Central journal article supplement (PMC8788244; doi:10.1136/jclinpath-2021-207967), 2021-11-09
Supplement: jclinpath-2021-207967supp001.pdf [file jclinpath-2021-207967supp001.pdf]

**Appendix 1 Example dataset for liver biopsy reporting in NASH clinical trials**

| <b>Sample adequacy</b>                                                     |                                                                         |
|----------------------------------------------------------------------------|-------------------------------------------------------------------------|
| Length                                                                     | x mm                                                                    |
| Number of portal tracts                                                    | x                                                                       |
| Staining quality: H&E                                                      | Acceptable/poor                                                         |
| Staining quality: connective tissue (Masson's trichrome or picosirius red) | Acceptable/poor                                                         |
| Staining quality: reticulin                                                | Acceptable/poor                                                         |
| Staining quality: PASD                                                     | Acceptable/poor                                                         |
| Staining quality: PAS                                                      | Acceptable/poor                                                         |
| Staining quality: copper stain (orcein or rhodamine)                       | Acceptable/poor                                                         |
| Staining quality: Perls' iron                                              | Acceptable/poor                                                         |
| <b>NAS</b>                                                                 |                                                                         |
| Steatosis                                                                  | 0, 1, 2, 3                                                              |
| Lobular inflammation                                                       | 0, 1, 2, 3                                                              |
| Ballooning                                                                 | 0, 1, 2                                                                 |
| Total NAS                                                                  |                                                                         |
| <b>Fibrosis</b>                                                            |                                                                         |
| CRN Stage                                                                  | 0, 1a, 1b, 1c, 2, 3, 4                                                  |
| Signs of regression                                                        | Y/N                                                                     |
|                                                                            | If Y: thin septa; hepatocytes growing into septa or vessel walls, other |
| <b>Portal inflammation</b>                                                 |                                                                         |
| Grade                                                                      | Mild, moderate, severe                                                  |
| Cell types                                                                 |                                                                         |
| Diffuse or focal                                                           | Diffuse/focal                                                           |
| Granulomas or lymphoid follicles?                                          | Y/N                                                                     |
|                                                                            | If Y: infiltration into duct: Y/N                                       |
| Interface hepatitis                                                        | Y/N                                                                     |
|                                                                            | If Y, zone 3 necrosis?: Y/N                                             |
|                                                                            | If Y, focal IH; mod IH (<50%); marked (>50%)                            |
|                                                                            | If Y, cell type:                                                        |
| <b>Bile ducts</b>                                                          |                                                                         |
| Normal number                                                              | Y/N                                                                     |
| Epithelial injury                                                          | Y/N                                                                     |
|                                                                            | If Y: describe                                                          |
| Bile ductular proliferation/Ductular reaction                              | Y/N                                                                     |
| Basement membrane thickening                                               | Y/N                                                                     |

|                                             |                                                                   |
|---------------------------------------------|-------------------------------------------------------------------|
| Concentric periductal sclerosis             | Y/N                                                               |
| <b>Vascular alterations</b>                 |                                                                   |
| Terminal hepatic vein                       | Y/N:<br>If Y: perivenul fibrosis; subintimal fibrosis/SHN; other: |
| Portal vein branches                        | Y/N<br>If Y: extruded; subintimal thickening; other:              |
|                                             | Periportal/paraportal shunt vessels present? Y/N                  |
| Hepatic artery branches                     | Thickened or smudged media: Y/N                                   |
| Sinusoids                                   | Capillarization? Y/N                                              |
| <b>PASD</b>                                 |                                                                   |
| Alpha-1 antitrypsin globules                | Y/N                                                               |
| <b>Iron</b>                                 |                                                                   |
| Reticuloendothelial system (RES) iron grade | None, mild, moderate or above                                     |
| If present, location                        | Hepatocyte; Sinusoidal lining cells; Both; Gradient present: Y/N  |
| <b>Reticulin</b>                            |                                                                   |
| Abnormalities (eg hyperplasia, nodularity)  | Y/N                                                               |
| <b>Copper stain</b>                         |                                                                   |
| Granules                                    | Positive/negative                                                 |
| <b>Comments</b>                             |                                                                   |
| <b>Diagnosis</b>                            |                                                                   |
| NAFL                                        | Y/N                                                               |
| NASH                                        | Y/N                                                               |
| Not NAFL                                    | Y/N                                                               |
| Other                                       |                                                                   |
